# Supplementary material for: Using Immediate Response Technology to Gather Electronic Health Data and Promote Telemental Health Among Youth
Source: PubMed Central journal article supplement (PMC6078147; doi:10.5334/egems.231), 2018-07-31
Supplement: egems-6-1-231-s1.pdf [file egems-6-1-231-s1.pdf]

## **Appendix A.**

Telemental health resources showcased in survey:

### *Anonymous Chat with Trained Non-professionals*

- 7 Cups of Tea ([www.7cups.com](http://www.7cups.com))
- Crisis Text Line ([www.crisistextline.org](http://www.crisistextline.org))
- Lifeline Crisis Chat ([www.crisischat.org](http://www.crisischat.org))

### *Online Therapist Resources* (provided by licensed mental health professionals)

- Talkspace ([www.talkspace.com](http://www.talkspace.com))
- BetterHelp ([www.betterhelp.com](http://www.betterhelp.com))

### *Self-help Resources*

- Pacifica ([www.thinkpacifica.com](http://www.thinkpacifica.com))
- Now Matters Now ([www.nowmattersnow.org](http://www.nowmattersnow.org))
